# Supplementary material for: Predictors of Post-Exercise Energy Intake in Adolescents Ranging in Weight Status from Overweight to Severe Obesity
Source: MDPI journal article supplement (doi:10.3390/nu14010223), 2022-01-05
Supplement: s1 [file s1]

**Supplemental Table S1.** Menu and portion sizes of food served at the post-exercise *ad libitum* dinner test-meal. No additional servings were made available. Macronutrient distribution (% of total kcal) was 44.4% carbohydrate, 40.9% fat, and 14.7% protein.

| <b>Food Item</b>                                      | <b>Food weight<br/>(g)</b> | <b>Energy<br/>(kcal)</b> |
|-------------------------------------------------------|----------------------------|--------------------------|
| Chicken nuggets (Applause)                            | 356                        | 801                      |
| Macaroni pasta with cheese (Stouffer's)               | 600                        | 888                      |
| Chocolate chip cookies (Famous Amos)                  | 150                        | 776                      |
| Steamed broccoli with butter (Sysco, Wholesome Farms) | 320                        | 227                      |
| Ketchup (Heinz)                                       | 108                        | 120                      |
| Barbeque sauce (Heinz)                                | 112                        | 140                      |
| Water (32 fl oz)                                      | 946                        | 0                        |
| <b>TOTAL</b>                                          | <b>1,646</b>               | <b>2,952</b>             |
